# Supplementary material
Source: Springer Nature journal article supplement (https://www.springermedizin.de/resource/supplementary/12889_2010_3081_MOESM2_ESM.pdf/9488076)
Supplement: MOESM2 [file 9488076]

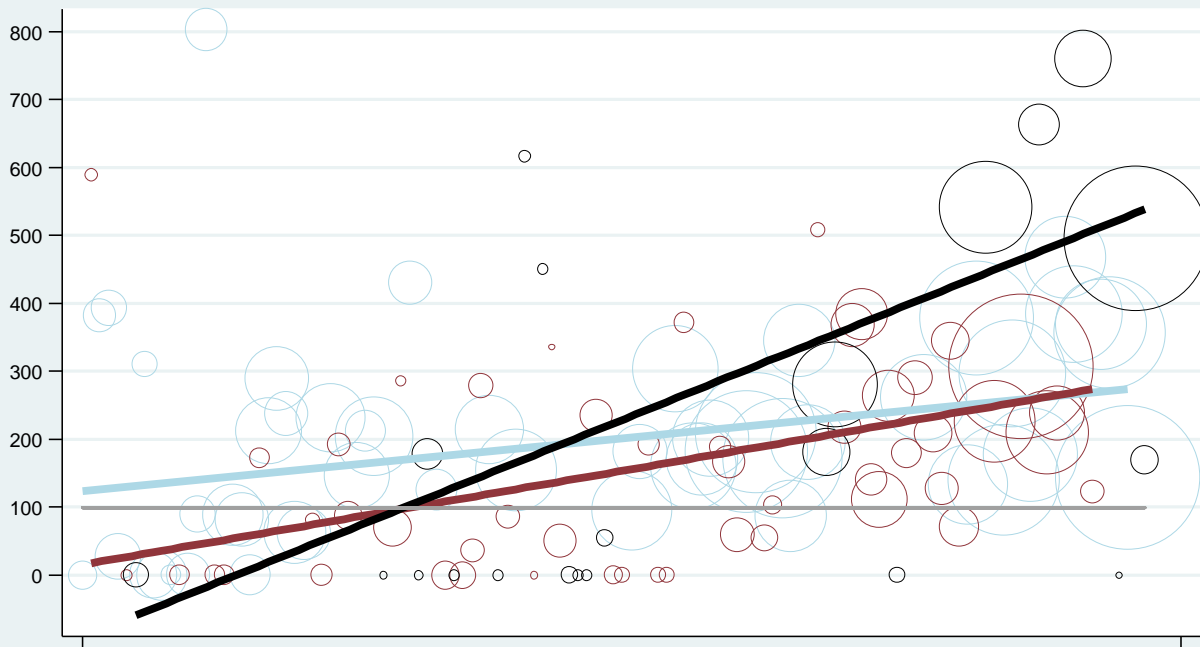

Least disadvantage

2006 IRSD rank

Most disadvantage

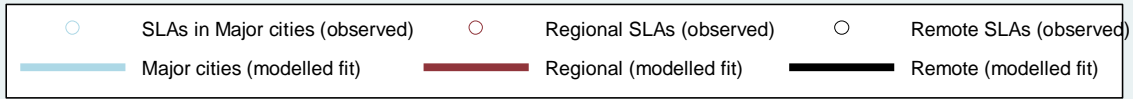

SLA markers weighted by Aboriginal population
